# Supplementary material for: Early implementation of guidelines for managing young infants with possible serious bacterial infection in Bangladesh
Source: PubMed Central journal article supplement — BMJ Glob Health. 2019 Nov 19;4(6):e001643. doi: 10.1136/bmjgh-2019-001643 (PMC6882554; doi:10.1136/bmjgh-2019-001643), 2019-11-19
Supplement: bmjgh-2019-001643supp001.pdf [file bmjgh-2019-001643supp001.pdf]

| <b>Component of Implementation Readiness</b>                                                                  | <b>Challenge</b>                                                                                                      | <b>Level of Health System</b>     | <b>MaMoni HSS Activities</b>                                                                                                                                                                                                                                                                                                                                                                                                                                                                                                                                                                                                                                                                                                                                                           |
|---------------------------------------------------------------------------------------------------------------|-----------------------------------------------------------------------------------------------------------------------|-----------------------------------|----------------------------------------------------------------------------------------------------------------------------------------------------------------------------------------------------------------------------------------------------------------------------------------------------------------------------------------------------------------------------------------------------------------------------------------------------------------------------------------------------------------------------------------------------------------------------------------------------------------------------------------------------------------------------------------------------------------------------------------------------------------------------------------|
| Ensure adequate supply of core equipment, medicine and logistics required for infection management in UH&FWCs | Prior to implementation of guidelines, adequate supply of essential drugs and equipment were not available at UH&FWCs | Upazila                           | <ul style="list-style-type: none"> <li>The project provided interim support to the MOHFW to ensure core items were available in the upazila supply chains for disbursement at union level:               <ul style="list-style-type: none"> <li><b>Equipment:</b> Thermometer, infant weighing scale, safety box for disposal of sharp instruments, ARI timer, insulin syringe</li> <li><b>Medicine:</b> Injectable gentamicin, oral amoxicillin pediatric drops</li> <li><b>Job aids:</b> Algorithm, dose calculation chart, <i>saf kotha</i> flip chart (counseling on Maternal and Newborn Health (MNH) messages)</li> <li><b>Reporting tools:</b> sick newborn and young infant service register, prescription forms, referral note, FPI surveillance forms</li> </ul> </li> </ul> |
|                                                                                                               |                                                                                                                       | Union                             | <ul style="list-style-type: none"> <li>Collaborated with MOHFW throughout program period to fill gaps in supply of core items at UH&amp;FWC</li> </ul>                                                                                                                                                                                                                                                                                                                                                                                                                                                                                                                                                                                                                                 |
| Capacity building of health workers to manage infections in young infants                                     | Providers involved in implementation did not have previous training on PSBI management                                | National/<br>District/<br>Upazila | <ul style="list-style-type: none"> <li>Training in PSBI management followed a cascade approach from the national to sub-district level. A pool of master trainers (MTs) were selected from district and sub-district level managers, in both DGHS and DGFP, and trained at the national level by a core trainer group.</li> <li>Supported the MOHFW to strengthen the quality of care for sick infants at the referral facilities, which included training of clinical providers on PSBI management; emergency triage, assessment and treatment (ETAT); and functioning of Special Care Newborn Units (SCANU) at district level facilities for the advance care of critical cases</li> </ul>                                                                                           |
|                                                                                                               |                                                                                                                       | Upazila &<br>Union                | <ul style="list-style-type: none"> <li>Provided 5-day training on PSBI management for 87 SACMOs including modules on the infection management guidelines               <ul style="list-style-type: none"> <li>Organized an additional 2-day competency-based training focusing on completing registers and reporting forms (totaling 7-days of training)</li> </ul> </li> <li>Provided 2-day training to FWV on PSBI management, including provision of 2<sup>nd</sup> dose of injectable gentamicin in the absence of the SACMO</li> </ul>                                                                                                                                                                                                                                            |
|                                                                                                               |                                                                                                                       | Union                             | <ul style="list-style-type: none"> <li>Oriented FPIs (1-day) on home follow-up of PSBI cases receiving simplified antibiotic treatment</li> <li>Facilitated Day 8 visit with FPI including accompanying FPI on home visits to provide on-the-job coaching on assessment of infant and completion of register</li> </ul>                                                                                                                                                                                                                                                                                                                                                                                                                                                                |

|                                                                             |                                                                                          |                      |                                                                                                                                                                                                                                                                                                                                                                                                                                                                                                                                                                                                                                                                        |
|-----------------------------------------------------------------------------|------------------------------------------------------------------------------------------|----------------------|------------------------------------------------------------------------------------------------------------------------------------------------------------------------------------------------------------------------------------------------------------------------------------------------------------------------------------------------------------------------------------------------------------------------------------------------------------------------------------------------------------------------------------------------------------------------------------------------------------------------------------------------------------------------|
| Supervision of health workers managing PSBI in young infants                | Vacancies in MOHFW manager positions responsible for the supervision of UH&FWC providers | District             | <ul style="list-style-type: none"> <li>Introduced a supervision and mentoring process to improve the quality of newborn care in the SCANU</li> </ul>                                                                                                                                                                                                                                                                                                                                                                                                                                                                                                                   |
|                                                                             |                                                                                          | Upazila              | <ul style="list-style-type: none"> <li>In each of the 10 sub-districts a medical officer working at the UHC was identified by their DGHS supervisor (i.e., Civil Surgeon) and appointed as the Newborn Focal Point (NBFP)               <ul style="list-style-type: none"> <li>The NBFP, in coordination with the technical supervisor of DGFP (i.e., Medical Officer-MCH-FP), led the implementation of the PSBI management in their respective sub-district</li> <li>Led monthly meetings with SACMOs at the UHC, which served as a platform for program monitoring, monthly report preparation and refresher sessions of technical knowledge</li> </ul> </li> </ul> |
|                                                                             |                                                                                          | Union                | <ul style="list-style-type: none"> <li>Developed a supervision checklist for PSBI management through a consultation process with district and sub-district level managers. Sub-district managers used this checklist during onsite supervision visits at the UH&amp;FWC</li> <li>Performance on the checklist was reviewed monthly at the sub-district level and quarterly at district level</li> <li>Project staff periodically joined MOHFW supervisors during visits to UH&amp;FWC</li> <li>MaMoni HSS extracted data from the SACMO's routine reporting forms monthly to monitor program progress</li> </ul>                                                       |
| Capacity building of CHWs in identification of newborn illness and referral | Promote new services available at UH&FWC                                                 | Ward/Community       | <ul style="list-style-type: none"> <li>Oriented Community Clinic staff (e.g., Community Health Care Providers [CHCP]) and GoB frontline workers (e.g., Family Welfare Assistant [FWA], Health Assistant [HA]) on identification of infant illness and appropriate sources of referral. Community Clinics (catchment area ~6,000 persons) are at the ward level and provide limited outpatient services. FWA and HA provide MNH messages during monthly home visits, ANC consultations, and bi-monthly satellites sessions for immunization and family planning services in the community.</li> </ul>                                                                   |
|                                                                             |                                                                                          | Union/Community/Ward | <ul style="list-style-type: none"> <li>Print media, including billboards and posters, were placed in public places to disseminate newborn care messages, and broadcasted through local cable networks.</li> </ul>                                                                                                                                                                                                                                                                                                                                                                                                                                                      |

|                                                           |                                                                                                  |                    |                                                                                                                                                                                                                                                                                                                                                                                                                                                                                                                                                                                                                                                                                                                                                            |
|-----------------------------------------------------------|--------------------------------------------------------------------------------------------------|--------------------|------------------------------------------------------------------------------------------------------------------------------------------------------------------------------------------------------------------------------------------------------------------------------------------------------------------------------------------------------------------------------------------------------------------------------------------------------------------------------------------------------------------------------------------------------------------------------------------------------------------------------------------------------------------------------------------------------------------------------------------------------------|
| Community mobilization and engagement of community groups | Delays in recognition of infant illness and prompt care-seeking from appropriate sources of care | Community/<br>Ward | <ul style="list-style-type: none"><li>• Developed a pool of unpaid Community Volunteers (CV) (1 per 250 persons) who work as an extended arm of GoB frontline workers<ul style="list-style-type: none"><li>○ Oriented CVs on maternal and newborn danger signs and the process for community referrals</li></ul></li><li>• CVs facilitated a peer-led monthly community meeting to collect data on vital events and illness episodes (i.e., births, deaths, referrals, etc.)<ul style="list-style-type: none"><li>○ Shared data with the GoB CHW during their monthly community Microplanning Meetings (cMPM)</li></ul></li><li>• CVs recorded treatment outcomes for young infants with suspected infection that were treated at the UH&amp;FWC</li></ul> |
|-----------------------------------------------------------|--------------------------------------------------------------------------------------------------|--------------------|------------------------------------------------------------------------------------------------------------------------------------------------------------------------------------------------------------------------------------------------------------------------------------------------------------------------------------------------------------------------------------------------------------------------------------------------------------------------------------------------------------------------------------------------------------------------------------------------------------------------------------------------------------------------------------------------------------------------------------------------------------|
